# Supplementary material for: Estrogen receptor blockade and radiation therapy cooperate to enhance the response of immunologically cold ER+ breast cancer to immunotherapy
Source: PubMed Central journal article supplement (PMC10265911; doi:10.1186/s13058-023-01671-y), 2023-06-13

**Additional file Figure S1.** Fulvestrant downregulates ER $\alpha$  expression and inhibits induction of estrogen target genes in ER+ TC11 tumor cells in vitro, and reduces uterine weight in vivo. (A) TC11 cells in culture were incubated with ethanol vehicle (control), 17 $\beta$ -estradiol (E2, 10nM) or fulvestrant (Fulv, 100nM) for 24h. (i) Cell lysates were fractionated by gel electrophoresis, and transferred to a PVDF membrane. The membrane was cut, and the upper portion probed with anti-ER $\alpha$ , and the lower portion probed with anti-ERK1/2 (loading control). Right, uncropped blot images. (ii) *Greb1* transcripts quantitated by qPCR (mean fold change  $\pm$  SEM, n=3). (B) Fulvestrant (250 mg/kg sc weekly) or peanut oil vehicle (control) was administered to tumor bearing mice (see Fig. 1B), and efficacy was confirmed by assessment of uterine weight 32 days after initiation of treatment. (mean  $\pm$  SEM, n=5; \*\*\*\*, p<0.0001).

A

i

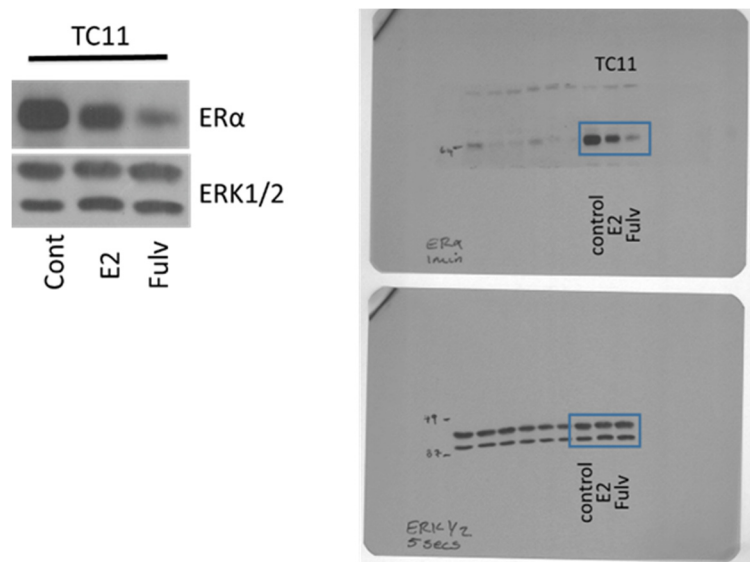

ii

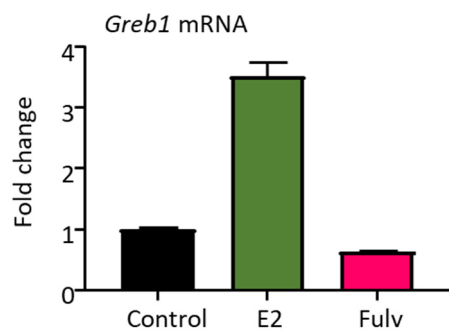

B

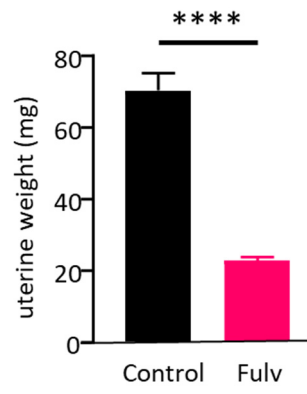

## Additional file Figure S2.

### A. Flow cytometry gating strategy used to interrogate innate immune subpopulations.

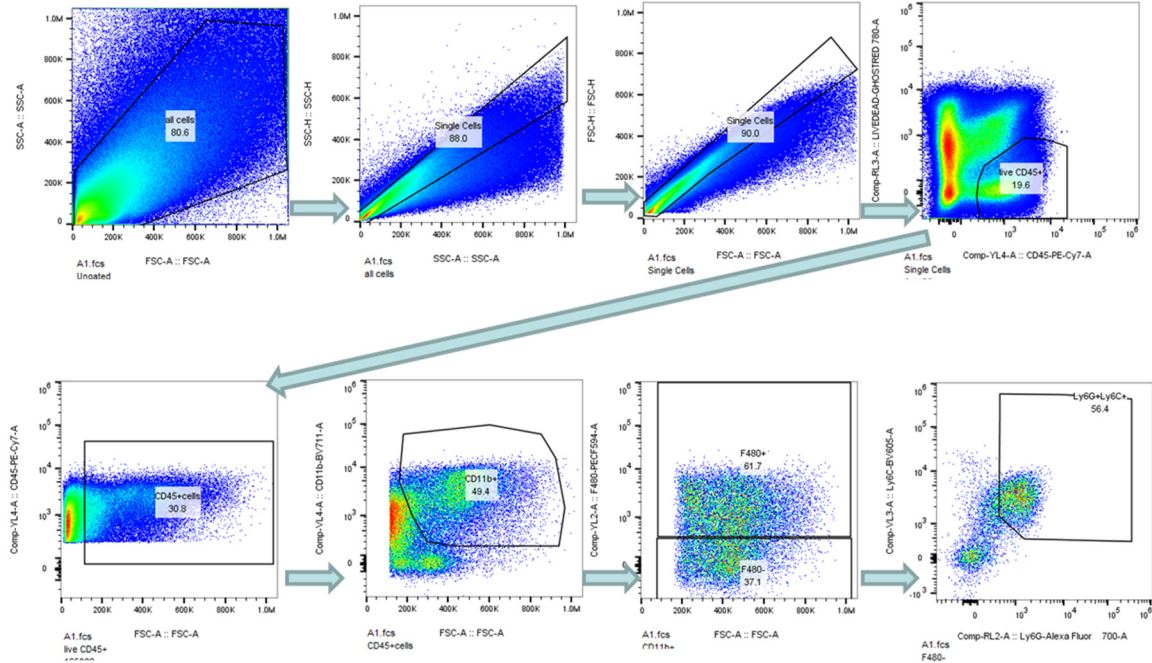

### B. Flow cytometry gating strategy used to interrogate adaptive immune subpopulations.

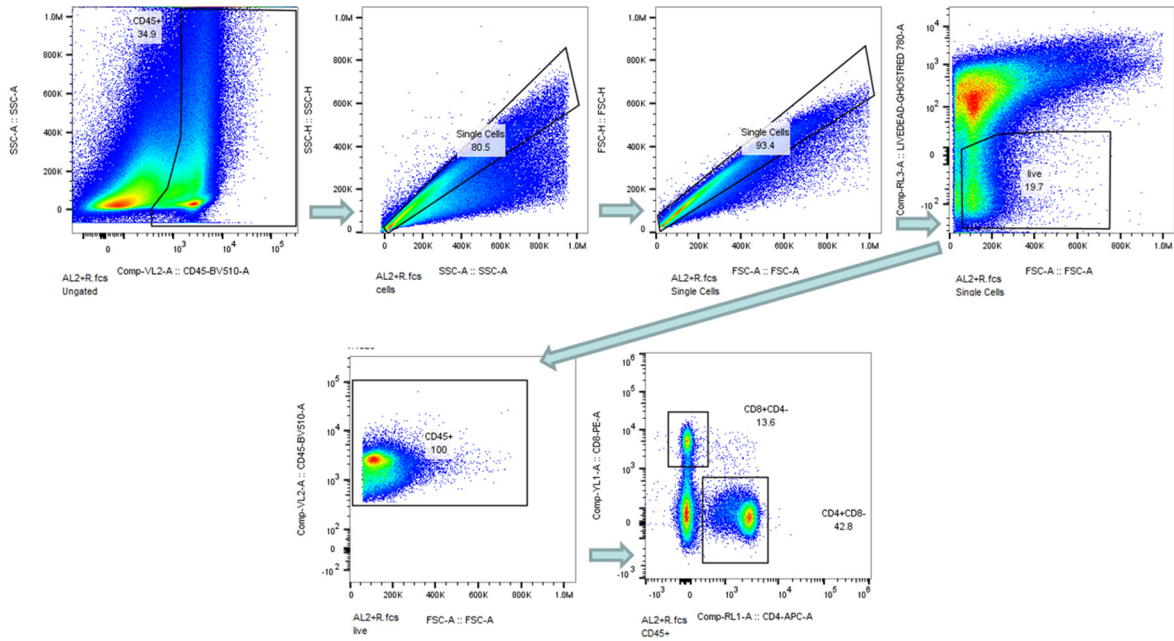

**Additional file Figure S3.** Fulvestrant reduces RT-recruited intratumoral Ly6C+/Ly6G+ cells. Animals were treated as shown in **Fig. 4A**, and effects of treatments examined 5 days after RT. Quantification of Ly6C+Ly6G+ cells by immunohistochemistry (mean  $\pm$  SEM, n=5) (See **Fig. 4D**). Differences among treatments were determined by one way ANOVA, followed by Tukey post tests. \*, P<0.05; \*\*, P<0.01; \*\*\*, P<0.001; \*\*\*\*, P<0.0001.

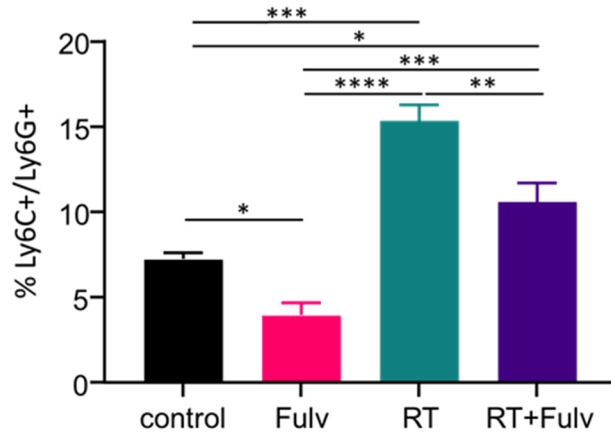

**Additional file Figure S4.** By day 25 after RT, tumor growth has resumed, and there are few long lasting changes in cytokines in the TME. Animals were treated as shown in **Fig. 6A**. Cytokine concentrations in tumor lysates collected from animals treated with vehicle, fulvestrant, RT, or RT + fulvestrant 53 days after transplantation (25 days after RT) were examined by multiplex immunoassays (see Materials and Methods). Individual tumors shown. With the exceptions of CCL2 (MCP1) and CXCL10 (IP-10) (**Fig. 6B**), no significant differences were observed between RT+ Fulv and other treatment groups at this time point.

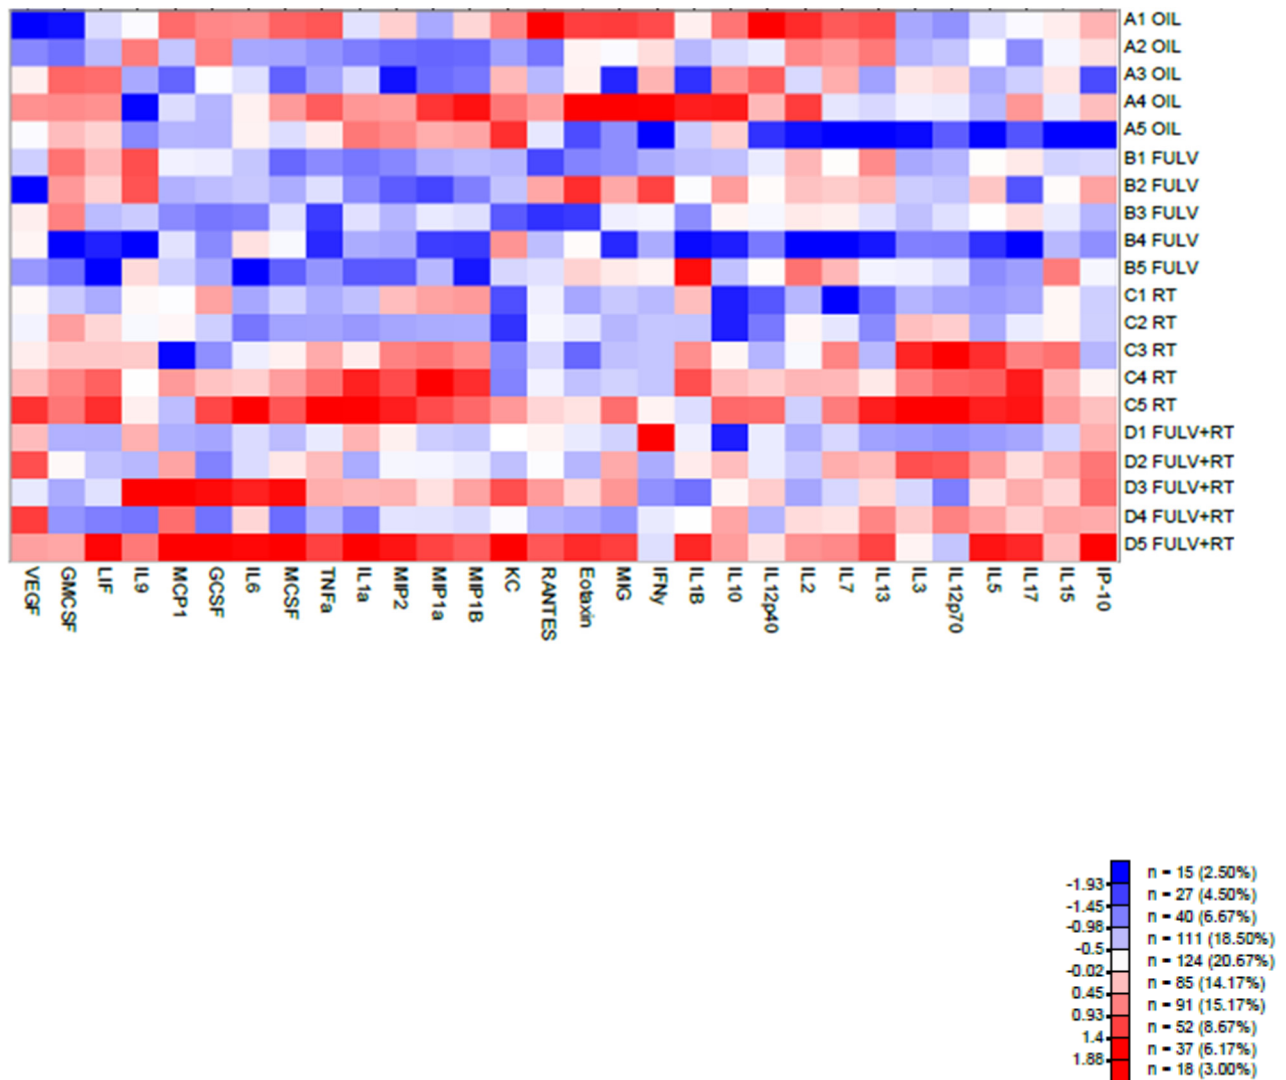

Supplement: 13058_2023_1671_MOESM2_ESM.pdf [file 13058_2023_1671_MOESM2_ESM.pdf]
