# Supplementary material for: Estrogen receptor blockade and radiation therapy cooperate to enhance the response of immunologically cold ER+ breast cancer to immunotherapy
Source: PubMed Central journal article supplement (PMC10265911; doi:10.1186/s13058-023-01671-y), 2023-06-13
Supplement: 13058_2023_1671_MOESM1_ESM.pdf [file 13058_2023_1671_MOESM1_ESM.pdf]

**Additional file 1 Table S1A.** Antibodies used for chromogenic immunohistochemistry

| Antigen     | Vendor/ Catalog number                      | Clone    | RRID            | Dilution |
|-------------|---------------------------------------------|----------|-----------------|----------|
| CD8         | ThermoFisher<br>14-0081-82                  | 53-6.7   | RRID:AB_467087  | 1:1000   |
| ER $\alpha$ | Santa Cruz<br>Biotechnology, Inc.<br>sc-542 | N/A      | RRID:AB_631470  | 1:500    |
| LY6C/LY6G   | Abcam<br>Ab25377                            | RB-6-8C5 | RRID:AB_470492  | 1:200    |
| PD-L1       | Invitrogen<br>14-5982-82                    | MIH5     | RRID:AB_467781  | 1:500    |
| F4/80       | Cell Signaling<br>Technology<br>70076       | D2S9R    | RRID:AB_2799771 | 1:1000   |

**Additional file 1 Table S1B.** Antibodies used for multiplex immunofluorescence

| Antigen   | Vendor/ Catalog number  | Clone    | RRID             | Dilution, incubation conditions | OPAL fluorophore |
|-----------|-------------------------|----------|------------------|---------------------------------|------------------|
| CD11B     | Abcam<br>Ab133357       | EPR1344  | RRID:AB_2650514  | 1:1500<br>15 min RT             | 540              |
| F4/80     | Abcam<br>Ab6640         | Cl:A3-1  | RRID:AB_1140040  | 1:50<br>45 min RT               | 520              |
| CD86      | Abcam<br>ab119857       | GL-1     | RRID:AB_10902800 | 1:100<br>30 min RT              | 620              |
| CD206     | Abcam<br>Ab64693        | N/A      | RRID:AB_1523910  | 1:1000<br>15 min RT             | 570              |
| LY6C/LY6G | Invitrogen<br>MAI-10401 | RB-6-8C5 | RRID:AB_11152791 | 1:100<br>ON 4°C                 | 650              |

**Additional file 1 Table S2.** Antibodies used to stain cells from disaggregated tumors for flow cytometry.

| Target    | Fluorophore          | Vendor            | Clone    |
|-----------|----------------------|-------------------|----------|
| Live/Dead | GhostRed 780         | Tonbo Biosciences | -        |
| CD11b     | Brilliant Violet 711 | BioLegend         | M1/70    |
| CD3       | FITC                 | Tonbo Biosciences | 17A2     |
| CD4       | Brilliant Violet 785 | BioLegend         | RM4-5    |
| CD4       | APC                  | Tonbo Biosciences | RM4-5    |
| CD45      | Brilliant Violet 510 | BioLegend         | 30-F11   |
| CD45      | PE-Cy7               | Tonbo Biosciences | 30-F11   |
| CD8A      | Alexa Fluor 700      | BioLegend         | 53-6.7   |
| CD8A      | PE                   | Tonbo Biosciences | 53-6.7   |
| FOXP3     | Brilliant Violet 421 | BioLegend         | MF-14    |
| F4/80     | PE-CF594             | BD Biosciences    | T45 2342 |
| Ly6C      | Brilliant Violet 605 | BioLegend         | HK1.4    |
| Ly6G      | Alexa Fluor 700      | BioLegend         | 1A8      |

**Additional file 1 Table S3A.** Primer sequences used for qPCR (SYBR green)

| Gene          | Forward Primer           | Reverse Primer          |
|---------------|--------------------------|-------------------------|
| <i>Cxcl10</i> | CGCTGCAACTGCATCCATA      | TAGGCTCGCAGGGATGATTTTC  |
| <i>Icos</i>   | TCTTGTAATACCCTGAGACTGTCC | TCGCAGAGGACTTCTCTCTCTC  |
| <i>Oas2</i>   | TAAGAGGCTGCTCCGATGGT     | GACGTCAAGGTATGCATCTTGGT |
| <i>Oas3</i>   | TTTCTCAGTCAAAGGCGTCCA    | TCTATCCAGTGTTCTCCGTCTG  |

**Additional file 1 Table S3B.** TaqMan™ predesigned gene expression assays

| Gene                | TaqMan Probe  |
|---------------------|---------------|
| <i>Greb1</i>        | Mm00479269_m1 |
| <i>Hprt</i>         | Mm03024075_m1 |
| <i>Ifnβ</i>         | Mm00439552_s1 |
| <i>Ifny</i>         | Mm01168134_m1 |
| <i>Mhc1 (H2-K1)</i> | Mm04208017_mH |
| <i>Mx1</i>          | Mm00487796_m1 |
| <i>Nos2</i>         | Mm00440502_m1 |
| <i>Pdl1 (CD274)</i> | Mm03048248_m1 |
